# Supplementary material for: A genome-wide identification and comparative analysis of the lentil MLO genes
Source: PubMed Central journal article supplement (PMC5865747; doi:10.1371/journal.pone.0194945), 2018-03-23

# S4 Fig

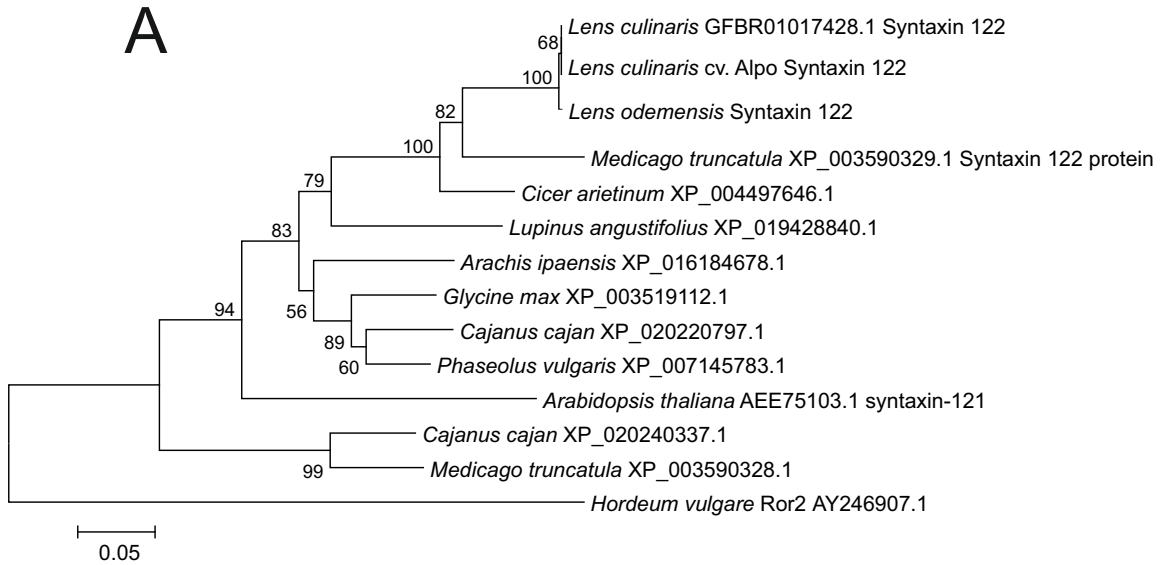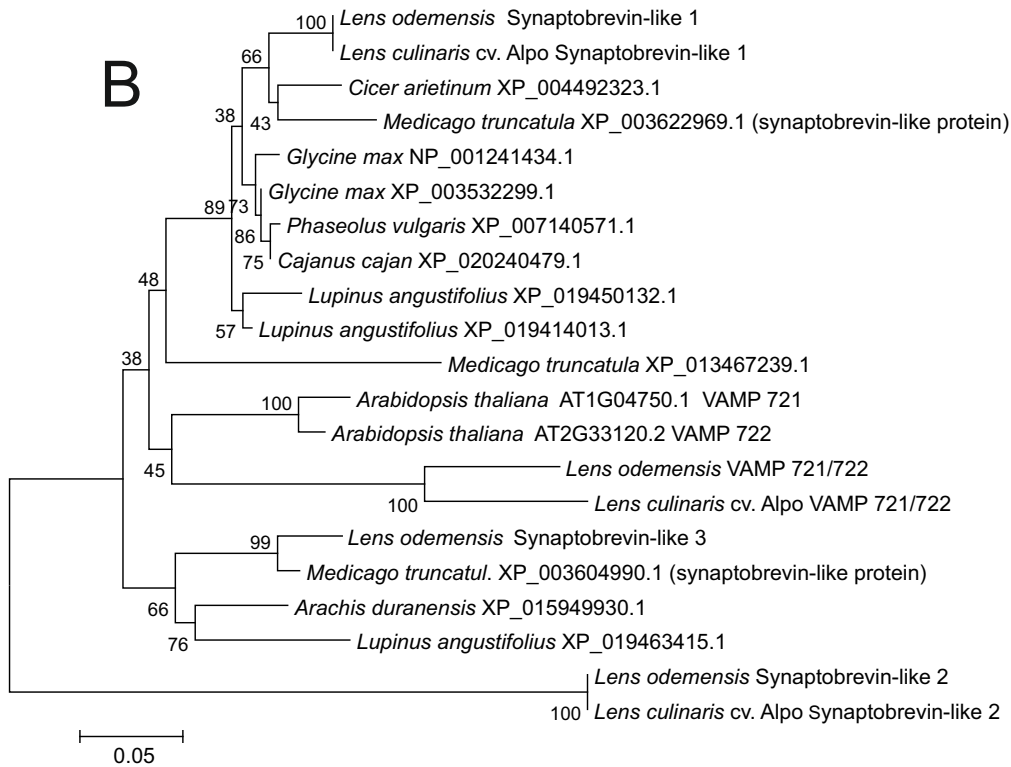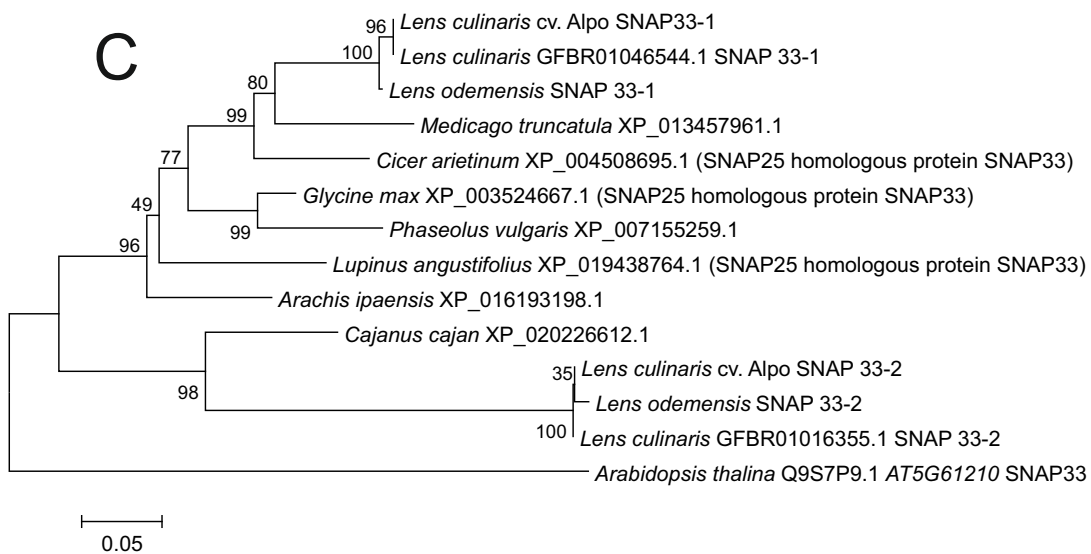

Supplement: pone.0194945.s004.pdf [file pone.0194945.s004.pdf]
