# Supplementary material for: A genome-wide identification and comparative analysis of the lentil MLO genes
Source: PubMed Central journal article supplement (PMC5865747; doi:10.1371/journal.pone.0194945), 2018-03-23
Supplement: pone.0194945.s006.pdf [file pone.0194945.s006.pdf]

**Supplementary Table S1.** Online prediction servers and tools used for the analysis of lentil *MLO* gene family

| Resources    | Characteristics and purpose                    | Web address                                                                                                             | References |
|--------------|------------------------------------------------|-------------------------------------------------------------------------------------------------------------------------|------------|
| SignalP 4.1  | Prediction of signal peptide                   | <a href="http://www.cbs.dtu.dk/services/SignalP">http://www.cbs.dtu.dk/services/SignalP</a>                             | 41         |
| TMHMM v2.0   | Prediction of transmembrane domains            | <a href="http://www.cbs.dtu.dk/services/TMHMM/">http://www.cbs.dtu.dk/services/TMHMM/</a>                               | 42         |
| CCTOP        | Prediction of transmembrane domains            | <a href="http://cctop.enzim.ttk.mta.hu/">http://cctop.enzim.ttk.mta.hu/</a>                                             | 43         |
| Plant-mPloc  | Prediction of protein subcellular localisation | <a href="http://www.csbio.sjtu.edu.cn/bioinf/plant-multi/">http://www.csbio.sjtu.edu.cn/bioinf/plant-multi/</a>         | 44         |
| InterProScan | Protein domain identification                  | <a href="http://www.ebi.ac.uk/interpro/search/sequence-search">http://www.ebi.ac.uk/interpro/search/sequence-search</a> | 45         |
| CaM          | Prediction of calmodulin binding domains       | <a href="http://cam.umassmed.edu/Seqsearch.php">http://cam.umassmed.edu/Seqsearch.php</a>                               | 46         |
| ExpASy       | Compute pI/Mw tool                             | <a href="http://web.expasy.org/compute_pi/">http://web.expasy.org/compute_pi/</a>                                       | 47         |
