# Supplementary material for: A genome-wide identification and comparative analysis of the lentil MLO genes
Source: PubMed Central journal article supplement (PMC5865747; doi:10.1371/journal.pone.0194945), 2018-03-23
Supplement: pone.0194945.s007.pdf [file pone.0194945.s007.pdf]

**Supplementary Table S2.**-Analyzed accessions of cultivated and wild relatives of lentil.

| Accession ID                | Species                                       | Country of origin | Source                 |
|-----------------------------|-----------------------------------------------|-------------------|------------------------|
| <sup>s</sup> Alpo BGE025606 | <i>Lens culinaris</i> subsp. <i>culinaris</i> | Spain             | Univ. of León (Spain)  |
| <sup>s</sup> Lupa BGE008693 | <i>Lens culinaris</i> subsp. <i>culinaris</i> | Spain             | Univ. of León (Spain)  |
| Tetir BGE016363             | <i>Lens culinaris</i> subsp. <i>culinaris</i> | Canary I. (Spain) | CRF-INIA (Spain)       |
| Mala BGE029091              | <i>Lens culinaris</i> subsp. <i>culinaris</i> | Canary I. (Spain) | CRF-INIA (Spain)       |
| BGE016364                   | <i>Lens culinaris</i> subsp. <i>culinaris</i> | Canary I. (Spain) | CRF-INIA (Spain)       |
| BGE016365                   | <i>Lens culinaris</i> subsp. <i>culinaris</i> | Canary I. (Spain) | CRF-INIA (Spain)       |
| Verdina                     | <i>Lens culinaris</i> subsp. <i>culinaris</i> | Spain             | Univ. of León (Spain)  |
| WA8649041                   | <i>Lens culinaris</i> subsp. <i>culinaris</i> | USA               | Washington State Univ. |
| WA8649090                   | <i>Lens culinaris</i> subsp. <i>culinaris</i> | USA               | Washington State Univ. |
| ILL52                       | <i>Lens culinaris</i> subsp. <i>culinaris</i> | Iraq              | ICARDA                 |
| ILL60                       | <i>Lens culinaris</i> subsp. <i>culinaris</i> | Iraq              | ICARDA                 |
| ILL62                       | <i>Lens culinaris</i> subsp. <i>culinaris</i> | Iraq              | ICARDA                 |
| ILL69                       | <i>Lens culinaris</i> subsp. <i>culinaris</i> | Cyprus            | ICARDA                 |
| ILL74                       | <i>Lens culinaris</i> subsp. <i>culinaris</i> | Chile             | ICARDA                 |
| ILL77                       | <i>Lens culinaris</i> subsp. <i>culinaris</i> | Chile             | ICARDA                 |
| ILL92                       | <i>Lens culinaris</i> subsp. <i>culinaris</i> | Ukraine           | ICARDA                 |
| ILL96                       | <i>Lens culinaris</i> subsp. <i>culinaris</i> | Morocco           | ICARDA                 |
| ILL144                      | <i>Lens culinaris</i> subsp. <i>culinaris</i> | Turkey            | ICARDA                 |
| ILL191                      | <i>Lens culinaris</i> subsp. <i>culinaris</i> | Lebanon           | ICARDA                 |
| ILL296                      | <i>Lens culinaris</i> subsp. <i>culinaris</i> | Greece            | ICARDA                 |
| ILL323                      | <i>Lens culinaris</i> subsp. <i>culinaris</i> | Serbia            | ICARDA                 |
| ILL343                      | <i>Lens culinaris</i> subsp. <i>culinaris</i> | Italy             | ICARDA                 |
| ILL389                      | <i>Lens culinaris</i> subsp. <i>culinaris</i> | Chile             | ICARDA                 |
| ILL442                      | <i>Lens culinaris</i> subsp. <i>culinaris</i> | Chile             | ICARDA                 |
| ILL458                      | <i>Lens culinaris</i> subsp. <i>culinaris</i> | Chile             | ICARDA                 |
| ILL459                      | <i>Lens culinaris</i> subsp. <i>culinaris</i> | Chile             | ICARDA                 |
| ILL508                      | <i>Lens culinaris</i> subsp. <i>culinaris</i> | Italy             | ICARDA                 |
| ILL526                      | <i>Lens culinaris</i> subsp. <i>culinaris</i> | Iran              | ICARDA                 |
| ILL590                      | <i>Lens culinaris</i> subsp. <i>culinaris</i> | Turkey            | ICARDA                 |
| ILL662                      | <i>Lens culinaris</i> subsp. <i>culinaris</i> | Turkey            | ICARDA                 |
| ILL868                      | <i>Lens culinaris</i> subsp. <i>culinaris</i> | Iran              | ICARDA                 |
| ILL913                      | <i>Lens culinaris</i> subsp. <i>culinaris</i> | Spain             | ICARDA                 |
| ILL918                      | <i>Lens culinaris</i> subsp. <i>culinaris</i> | Tunisia           | ICARDA                 |
| ILL1021                     | <i>Lens culinaris</i> subsp. <i>culinaris</i> | Iran              | ICARDA                 |
| ILL1199                     | <i>Lens culinaris</i> subsp. <i>culinaris</i> | Iran              | ICARDA                 |
| ILL1323                     | <i>Lens culinaris</i> subsp. <i>culinaris</i> | Iran              | ICARDA                 |
| ILL1349                     | <i>Lens culinaris</i> subsp. <i>culinaris</i> | Iran              | ICARDA                 |
| ILL1370                     | <i>Lens culinaris</i> subsp. <i>culinaris</i> | Iran              | ICARDA                 |
| ILL1645                     | <i>Lens culinaris</i> subsp. <i>culinaris</i> | Colombia          | ICARDA                 |
| ILL1827                     | <i>Lens culinaris</i> subsp. <i>culinaris</i> | Chile             | ICARDA                 |
| ILL1832                     | <i>Lens culinaris</i> subsp. <i>culinaris</i> | Chile             | ICARDA                 |
| ILL1840                     | <i>Lens culinaris</i> subsp. <i>culinaris</i> | Chile             | ICARDA                 |
| ILL1841                     | <i>Lens culinaris</i> subsp. <i>culinaris</i> | Chile             | ICARDA                 |
| ILL1842                     | <i>Lens culinaris</i> subsp. <i>culinaris</i> | Chile             | ICARDA                 |
| ILL1845                     | <i>Lens culinaris</i> subsp. <i>culinaris</i> | Chile             | ICARDA                 |
| ILL1879                     | <i>Lens culinaris</i> subsp. <i>culinaris</i> | Turkey            | ICARDA                 |

|                        |                                                |                |                              |
|------------------------|------------------------------------------------|----------------|------------------------------|
| ILL1890                | <i>Lens culinaris</i> subsp. <i>culinaris</i>  | Tunisia        | ICARDA                       |
| ILL1918                | <i>Lens culinaris</i> subsp. <i>culinaris</i>  | Austria        | ICARDA                       |
| ILL2249                | <i>Lens culinaris</i> subsp. <i>culinaris</i>  | Iran           | ICARDA                       |
| ILL2257                | <i>Lens culinaris</i> subsp. <i>culinaris</i>  | Iran           | ICARDA                       |
| ILL2307                | <i>Lens culinaris</i> subsp. <i>culinaris</i>  | Chile          | ICARDA                       |
| ILL3042                | <i>Lens culinaris</i> subsp. <i>culinaris</i>  | India          | ICARDA                       |
| ILL3286                | <i>Lens culinaris</i> subsp. <i>culinaris</i>  | India          | ICARDA                       |
| ILL3312                | <i>Lens culinaris</i> subsp. <i>culinaris</i>  | India          | ICARDA                       |
| ILL3467                | <i>Lens culinaris</i> subsp. <i>culinaris</i>  | Ethiopia       | ICARDA                       |
| ILL3510                | <i>Lens culinaris</i> subsp. <i>culinaris</i>  | India          | ICARDA                       |
| ILL3596                | <i>Lens culinaris</i> subsp. <i>culinaris</i>  | India          | ICARDA                       |
| ILL5588                | <i>Lens culinaris</i> subsp. <i>culinaris</i>  | Jordan         | ICARDA                       |
| <sup>s</sup> BGE016880 | <i>Lens culinaris</i> subsp. <i>orientalis</i> | Israel         | CRF-INIA (Spain)             |
| ILWL7                  | <i>Lens culinaris</i> subsp. <i>orientalis</i> | Turkey         | ICARDA                       |
| ILWL11                 | <i>Lens culinaris</i> subsp. <i>orientalis</i> | Syria          | ICARDA                       |
| LENS166/92             | <i>Lens culinaris</i> subsp. <i>orientalis</i> | Unknown        | Dr. Rubiales (Spain)         |
| <sup>s</sup> ILWL235   | <i>Lens odemensis</i>                          | Syria          | ICARDA                       |
| <sup>s</sup> ILWL39    | <i>Lens odemensis</i>                          | Turkey         | ICARDA                       |
| ILWL21                 | <i>Lens odemensis</i>                          | Israel         | ICARDA                       |
| ILWL164                | <i>Lens odemensis</i>                          | Syria          | ICARDA                       |
| ILWL238                | <i>Lens odemensis</i>                          | Syria          | ICARDA                       |
| ILWL252                | <i>Lens odemensis</i>                          | Syria          | ICARDA                       |
| <sup>s</sup> 244       | <i>Lens lamottei</i>                           | Morocco        | Prof. G. Ladizinsky (Israel) |
| ILWL29                 | <i>Lens lamottei</i>                           | Spain          | ICARDA                       |
| ILWL428                | <i>Lens lamottei</i>                           | Spain          | ICARDA                       |
| <sup>s</sup> BGE016873 | <i>Lens nigricans</i>                          | Fr. Yugoslavia | CRF-INIA (Spain)             |
| BGE019580              | <i>Lens nigricans</i>                          | Spain          | CRF-INIA (Spain)             |
| BGE019582              | <i>Lens nigricans</i>                          | Spain          | CRF-INIA (Spain)             |
| ILWL30                 | <i>Lens nigricans</i>                          | Spain          | ICARDA                       |
| <sup>s</sup> 133       | <i>Lens tomentosus</i>                         | Turkey         | Prof. G. Ladizinsky          |
| ILWL90                 | <i>Lens tomentosus</i>                         | Turkey         | ICARDA                       |
| ILWL120                | <i>Lens tomentosus</i>                         | Syria          | ICARDA                       |
| <sup>s</sup> BGE016877 | <i>Lens ervoides</i>                           | Israel         | CRF-INIA (Spain)             |
| ILWL43                 | <i>Lens ervoides</i>                           | Croatia        | ICARDA                       |
| ILWL54                 | <i>Lens ervoides</i>                           | Israel         | ICARDA                       |

<sup>s</sup> MLO1 and MLO3 complete sequences obtained in this work (Fig 6).
