# Supplementary material for: A genome-wide identification and comparative analysis of the lentil MLO genes
Source: PubMed Central journal article supplement (PMC5865747; doi:10.1371/journal.pone.0194945), 2018-03-23
Supplement: pone.0194945.s008.pdf [file pone.0194945.s008.pdf]

**Supplementary Table 3.** Sets of primers used for amplification of *MLO1* and *MLO3* genes.

| Gene and primer pair | Primer name            | Sequence (5'-3')                                      | Amplicon size (bp)* |
|----------------------|------------------------|-------------------------------------------------------|---------------------|
| <i>MLO1</i> / A      | Pro0028-F<br>03E0870-R | GCCCTTCAATATTTTCATGACC<br>CAAGAATTCTCCGAGGTATTGG      | 843                 |
| <i>MLO1</i> / A2     | 01E0230-F<br>04E1066-R | TTTGGGAAGAGACGCCAACTT<br>GTTTAACGGCCACAATACGC         | 837                 |
| <i>MLO1</i> / A3     | Pro0160-F<br>03E0852-R | AATCATCTCAAGTTGCAACAAA<br>TTGGATCAAATACTCCAAGAG       | 693                 |
| <i>MLO1</i> / B      | 03E0747-F<br>06E1748-R | ACTTGGCATCCTTGTTCCAC<br>GTTGTGTCCCTTGCAAACCT          | 1002                |
| <i>MLO1</i> / C      | 05E1356-F<br>09E2479-R | ATGCGGAAGTGGGAAGACTTG<br>AAAGCACTGTGAAAAGCCAGA        | 1124                |
| <i>MLO1</i> / C2     | 05E1356-F<br>08E2187-R | ATGCGGAAGTGGGAAGACTTG<br>TTCCTACTACAACCTTTAAAATCCTCTT | 832                 |
| <i>MLO1</i> / D      | 08E2117-F<br>11E2862-R | TGATGCACAATTTGATTTCCA<br>AGAAGAAGGCGGAGGACGATT        | 746                 |
| <i>MLO1</i> / E      | 11E2732-F<br>14E3440-R | GGTGCTAAGTTACAAATGATCATAAC<br>AGCATAAAGAGGCAAAGTCACA  | 709                 |
| <i>MLO1</i> / F      | 13E3254-F<br>15E4165-R | TTGCTTCCACAAAACCACTG<br>GTTGATGGCTGGCTTGAGTT          | 912                 |
| <i>MLO1</i> / F2     | 14E3419-F<br>15E4235-R | TGTGACTTTGCCTCTTTATGCT<br>TTGTGGACTGTCGCTGTTTC        | 817                 |
| <i>MLO1</i> / G      | 15E4026-F<br>Ter4541-R | ATGGGATCAACCATGAAACC<br>TCTTCATCTGCAAGAGTGTACC        | 516                 |
| <i>MLO1</i> / G2     | 15E4026-F<br>15E4457-R | ATGGGATCAACCATGAAACC<br>TTCTAATCGCTCCCTCCCTA          | 432                 |
| <i>MLO3</i> / A-M3   | Pro0071-F<br>03E0919-R | GCGTCAAAGTTCAACAGCTT<br>GCTGGTGAATTCCATCTGCT          | 849                 |
| <i>MLO3</i> / A2-M3  | 01E0323-F<br>03E0919-R | TGGAGAAGGTGGAGGAAGAA<br>GCTGGTGAATTCCATCTGCT          | 597                 |
| <i>MLO3</i> / B-M3   | 03E0769-F<br>06E1465-R | AATGCCGCTAAAGGTGAAGA<br>TGACCTTACAAATTGCCTGAA         | 697                 |
| <i>MLO3</i> / C-M3   | 05E1295-F<br>10E2130-R | TGGAAGAAGACACTTGAGTTTTTG<br>CTTGCAACTTTGTTCCAACC      | 836                 |
| <i>MLO3</i> / C2-M3  | 07E1626-F<br>11E2411-R | CATTTGGCACCTTCAAGTCA<br>GCAGTCCATGAAAAGAAAGCA         | 786                 |
| <i>MLO3</i> / D-M3   | 09E1981-F<br>14E2948-R | TCTCTGGCTACCATTTGTTCC<br>CCCACGGTTCTGCTTTATGT         | 968                 |
| <i>MLO3</i> / E-M3   | 13E2723-F<br>Ter3311-R | TGCAGCTATGTGACTCTTCCTC<br>ACAAACCAATCATCATCACA        | 589                 |
| <i>MLO3</i> / E2-M3  | 13E2723-F<br>14E3282-R | TGCAGCTATGTGACTCTTCCTC<br>CCAATTGATTTGTGGCCATT        | 560                 |

\* Expected size in *Lens culinaris subsp. culinaris* cv. CDC-Redberry
