# Supplementary material for: A genome-wide identification and comparative analysis of the lentil MLO genes
Source: PubMed Central journal article supplement (PMC5865747; doi:10.1371/journal.pone.0194945), 2018-03-23
Supplement: pone.0194945.s010.pdf [file pone.0194945.s010.pdf]

**Supplementary Table S5.** Protein characteristics and identity score of lentil MLOs with its closest homologues in *M. truncatula* and *A. thaliana*.

| Gene name       | Interproscan prediction |             | Subcellular localization <sup>a</sup> | SP <sup>b</sup> | Transmembrane domains <sup>c</sup> |   |   | Identity with <i>M. truncatula</i> |                                |            |      | Identity with <i>A. thaliana</i> |                |                              |            |      |               |
|-----------------|-------------------------|-------------|---------------------------------------|-----------------|------------------------------------|---|---|------------------------------------|--------------------------------|------------|------|----------------------------------|----------------|------------------------------|------------|------|---------------|
|                 | Pfam Ref.               | Name        |                                       |                 | Plant_mPloc                        | T | I | CCTOP                              | <i>M. truncatula</i> gene name | Blastp hit |      | Pair-wise (%)                    |                | <i>A. thaliana</i> gene name | Blastp hit |      | Pair-wise (%) |
|                 |                         |             | ID                                    |                 |                                    |   |   |                                    |                                | E-value    | Id   | Sim                              | ID             |                              | E-value    | Id   | Sim           |
| <i>LcMIO1</i>   | PF03094                 | MLO-related | CM                                    | NO              | 7                                  | 7 | 7 | <i>Medtr6g033330</i>               | 84                             | 0.0        | 83.4 | 90.2                             | <i>ATMLO6</i>  | 61                           | 0.0        | 60.2 | 74.4          |
| <i>LcMIO2</i>   | PF03094                 | MLO-related | CM                                    | NO              | 7                                  | 7 | 7 | <i>Medtr5g022400</i>               | 85                             | 0.0        | 81.3 | 91.4                             | <i>ATMLO4</i>  | 48                           | 4e-156     | 44.2 | 59.6          |
| <i>LcMIO3</i>   | PF03094                 | MLO-related | CM                                    | NO              | 7                                  | 7 | 7 | <i>Medtr2g093750</i>               | 80                             | 0.0        | 80.1 | 86.2                             | <i>ATMLO6</i>  | 62                           | 0.0        | 59.1 | 72.2          |
| <i>LcMIO4</i>   | PF03094                 | MLO-related | CM                                    | NO              | 7                                  | 7 | 7 | <i>Medtr2g028470</i>               | 85                             | 0.0        | 83.5 | 90.0                             | <i>ATMLO13</i> | 57                           | 1e-172     | 52.3 | 66.0          |
| <i>LcMIO5</i>   | PF03094                 | MLO-related | CM                                    | NO              | 7                                  | 7 | 7 | <i>Medtr3g115960</i>               | 85                             | 0.0        | 84.2 | 88.5                             | <i>ATMLO5</i>  | 57                           | 0.0        | 56.1 | 69.7          |
| <i>LcMIO6</i>   | PF03094                 | MLO-related | CM                                    | NO              | 8                                  | 8 | 8 | <i>Medtr5g024700</i>               | 80                             | 0.0        | 78.9 | 86.2                             | <i>ATMLO8</i>  | 58                           | 0.0        | 55.5 | 67.4          |
| <i>LcMIO7</i>   | PF03094                 | MLO-related | CM                                    | NO              | 7                                  | 7 | 7 | <i>Medtr2g006280</i>               | 91                             | 0.0        | 91.3 | 94.9                             | <i>ATMLO4</i>  | 65                           | 0.0        | 65.0 | 77.9          |
| <i>LcMIO8</i>   | PF03094                 | MLO-related | CM                                    | NO              | 7                                  | 7 | 7 | <i>Medtr3g115940</i>               | 90                             | 0.0        | 90.1 | 94.6                             | <i>ATMLO12</i> | 49                           | 0.0        | 47.5 | 64.0          |
| <i>LcMIO9</i>   | PF03094                 | MLO-related | CM                                    | NO              | 7                                  | 7 | 7 | <i>Medtr3g118190</i>               | 84                             | 0.0        | 83.8 | 87.8                             | <i>ATMLO1</i>  | 70                           | 0.0        | 64.8 | 72.8          |
| <i>LcMIO10A</i> | PF03094                 | MLO-related | CM                                    | NO              | 8                                  | 7 | 8 | <i>Medtr8g073130</i>               | 75                             | 0.0        | 75.0 | 84.7                             | <i>ATMLO8</i>  | 58                           | 0.0        | 56.0 | 70.8          |
| <i>LcMIO10B</i> | PF03094                 | MLO-related | CM                                    | NO              | 7                                  | 7 | 7 | <i>Medtr8g073130</i>               | 80                             | 0.0        | 76.7 | 84.4                             | <i>ATMLO8</i>  | 63                           | 0.0        | 56.7 | 69.4          |
| <i>LcMIO11</i>  | PF03094                 | MLO-related | CM                                    | NO              | 7                                  | 7 | 7 | <i>Medtr4g079140</i>               | 82                             | 0.0        | 80.4 | 86.5                             | <i>ATMLO12</i> | 42                           | 2e-151     | 38.8 | 57.4          |
| <i>LcMLO13</i>  | PF03094                 | MLO-related | CM                                    | NO              | 7                                  | 7 | 7 | <i>Medtr8g010500</i>               | 65                             | 0.0        | 60.5 | 74.2                             | <i>ATMLO1</i>  | 63                           | 0.0        | 57.5 | 67.7          |
| <i>LcMIO14</i>  | PF03094                 | MLO-related | CM                                    | NO              | 7                                  | 7 | 7 | <i>Medtr8g010530</i>               | 81                             | 0.0        | 80.5 | 88.5                             | <i>ATMLO1</i>  | 67                           | 0.0        | 62.0 | 72.8          |
| <i>LcMIO15</i>  | PF03094                 | MLO-related | CM                                    | NO              | 7                                  | 7 | 7 | <i>Medtr2g079500</i>               | 92                             | 0.0        | 91.7 | 96.0                             | <i>ATMLO11</i> | 69                           | 0.0        | 68.1 | 77.9          |

<sup>a</sup> Subcellular localization as predicted by the web server Plant-mPloc. CM stand for cell membrane

<sup>b</sup> Prediction of Signal peptide (SP) as indicated by SignalP server.

<sup>c</sup> Number of transmembrane domains (TM) as predicted by TMHMM (T) Interproscan5 (I) and CCTOP web servers
