# Supplementary material for: A genome-wide identification and comparative analysis of the lentil MLO genes
Source: PubMed Central journal article supplement (PMC5865747; doi:10.1371/journal.pone.0194945), 2018-03-23
Supplement: pone.0194945.s011.pdf [file pone.0194945.s011.pdf]

**Supplementary Table S6.** Conserved amino acids in MLO sequences according Elliot et al., 2005 [45]

| Elliot et al. 2005 |          | Number of lentil MLOs in which the residue is present and alternatives |      | Elliot et al. 2005 |          | Number of lentil MLOs in which the residue is present and alternatives |   |
|--------------------|----------|------------------------------------------------------------------------|------|--------------------|----------|------------------------------------------------------------------------|---|
| Amino acid         | Position |                                                                        |      | Amino acid         | Position |                                                                        |   |
| E                  | 35       | 13                                                                     | H, V | F                  | 227      | 15                                                                     | - |
| M                  | 65       | 15                                                                     | -    | F                  | 240      | 15                                                                     | - |
| G                  | 68       | 15                                                                     |      | Y                  | 243      | 14                                                                     | F |
| S                  | 71       | 15                                                                     | -    | W                  | 263      | 15                                                                     | - |
| L                  | 74       | 14                                                                     | M    | P                  | 287      | 15                                                                     | - |
| C                  | 86       | 15                                                                     | -    | F                  | 329      | 15                                                                     | - |
| C                  | 98       | 15                                                                     | -    | W                  | 330      | 15                                                                     | - |
| C                  | 114      | 15                                                                     | -    | P                  | 334      | 15                                                                     | - |
| F                  | 135      | 12                                                                     | S    | F                  | 346      | 14                                                                     | I |
| W                  | 158      | 15                                                                     | -    | N                  | 348      | 14                                                                     | I |
| E                  | 163      | 15                                                                     | -    | F                  | 350      | 14                                                                     | Y |
| F                  | 207      | 15                                                                     | -    | C                  | 367      | 15                                                                     | - |
| Q                  | 210      | 15                                                                     | -    | T                  | 393      | 14                                                                     | - |
| Y                  | 220      | 15                                                                     | -    | P                  | 395      | 14                                                                     | - |
| R                  | 224      | 15                                                                     | -    | W                  | 423      | 15                                                                     | H |
