# Supplementary material for: A genome-wide identification and comparative analysis of the lentil MLO genes
Source: PLoS One. 2018 Mar 23;13(3):e0194945. doi: 10.1371/journal.pone.0194945 (PMC5865747; doi:10.1371/journal.pone.0194945)
Supplement: S1 Fig — Alpo, Lupa and Redberry are cultivars of L. culinaris subsp. culinaris; Ps, Pisum sativum; Mt, Medicago truncatula; Ca, Cicer arietinum; the remaining names indicate the Lens species, or the subspecies orientalis of L. culinaris. Black lines indicate the transmembrane domains as defined by the CCTOP server (reliability = 88.81). Red line indicates the calmodulin binding domain as in Appiano et al. [1]. Green lines denote the two conserved motifs (1 and 2) of the C-terminal regions described by Panstruga [55]. (PDF) [file pone.0194945.s001.pdf]

## S1 Fig

|                              |     |                                                                                                                          |                                               |                                            |       |       |     |
|------------------------------|-----|--------------------------------------------------------------------------------------------------------------------------|-----------------------------------------------|--------------------------------------------|-------|-------|-----|
| ML01 ALPO                    | 1   | MAEGGVKERTLEETPTWAVAVVCLVLLAVS IL IEHT                                                                                   | IHVIGKWLKKRNKNALYEAEKIKGELMLLGFISLLLTVFQDNISE | ICISQKVGSTWHPGSTPKTKTETKSDSEF              | DNETN | -DRKL | 120 |
| ML01 LUPA                    | 1   | MAEGGVKERTLEETPTWAVAVVCLVLLAVS IL IEHT                                                                                   | IHVIGKWLKKRNKNALYEAEKIKGELMLLGFISLLLTVFQDNISE | ICISQKVGSTWHPGSTPKTKTETKSDSEF              | DNETN | -DRKL | 120 |
| ML01 <i>orientalis</i>       | 1   | MAEGGVKERTLEETPTWAVAVVCLVLLAVS IL IEHT                                                                                   | IHVIGKWLKKRNKNALYEAEKIKGELMLLGFISLLLTVFQDNISE | ICISQKVGSTWHPGSTPKTKTETKSDSEF              | DNETN | -DRKL | 120 |
| ML01 REDBERRY                | 1   | MAEGGVKERTLEETPTWAVAVVCLVLLAVS IL IEHT                                                                                   | IHVIGKWLKKRNKNALYEAEKIKGELMLLGFISLLLTVFQDNISE | ICISQKVGSTWHPGSTPKTKTETKSDSEF              | DNETN | -DRKL | 120 |
| ML01 <i>tomentosus</i>       | 1   | MAEGGVKERTLEETPTWAVAVVCLVLLAVS IL IEHT                                                                                   | IHVIGKWLKKRNKNALYEAEKIKGELMLLGFISLLLTVFQDNISE | ICISQKVGSTWHPGSTPKTKTETKSDSEF              | DNETN | -DRKL | 120 |
| ML01 <i>odemensis</i> ILL235 | 1   | MAEGGVKERTLEETPTWAVAVVCLVLLAVS IL IEHT                                                                                   | IHVIGKWLKKRNKNALYEAEKIKGELMLLGFISLLLTVFQDNISE | ICISQKVGSTWHPGSTPKTKTETKSDSEF              | DNETN | -DRKL | 120 |
| ML01 <i>odemensis</i> ILL39  | 1   | MAEGGVKERTLEETPTWAVAVVCLVLLAVS IL IEHT                                                                                   | IHVIGKWLKKRNKNALYEAEKIKGELMLLGFISLLLTVFQDNISE | ICISQKVGSTWHPGSTPKTKTETKSDSEF              | DNETN | -DRKL | 120 |
| ML01 <i>lamotei</i>          | 1   | MAEGGVKERTLEETPTWAVAVVCLVLLAVS IL IEHT                                                                                   | IHVIGKWLKKRNKNALYEAEKIKGELMLLGFISLLLTVFQDNISE | ICISQKVGSTWHPGSTPKTKTETKSDSEF              | DNETN | -DRKL | 120 |
| ML01 <i>ervoides</i>         | 1   | MAEGGVKERTLEETPTWAVAVVCLVLLAVS IL IEHT                                                                                   | IHVIGKWLKKRNKNALYEAEKIKGELMLLGFISLLLTVFQDNISE | ICISQKVGSTWHPGSTPKTKTETKSDSEF              | DNETN | -DRKL | 120 |
| ML01 <i>nigricans</i>        | 1   | MAEGGVKERTLEETPTWAVAVVCLVLLAVS IL IEHT                                                                                   | IHVIGKWLKKRNKNALYEAEKIKGELMLLGFISLLLTVFQDNISE | ICISQKVGSTWHPGSTPKTKTETKSDSEF              | DNETN | -DRKL | 120 |
| PsML01 ACO07297.1            | 1   | MAEGGVKERTLEETPTWAVAVVCLVLLAVS IL IEHT                                                                                   | IHVIGKWLKKRNKNALYEAEKIKGELMLLGFISLLLTVFQDNISE | ICISQKVGSTWHPGSTPKTKTETKSDSEF              | DNETN | -DRKL | 121 |
| MtML01 Medtr6g033330.1       | 1   | MAEDKVVYERTLEETPTWAVAVVCLVLLAVS IL IEHT                                                                                  | IHVIGKWLKKRNKNALYEAEKIKGELMLLGFISLLLTVFQDNISE | ICISQKVGSTWHPGSTPKTKTETKSDSEF              | DNETN | -DRKL | 119 |
| CaML02 XP_004515994.1        | 1   | MAAQ-VYERTLEETPTWAVAVVCLVLLAVS IL IEHT                                                                                   | IHVIGKWLKKRNKNALYEAEKIKGELMLLGFISLLLTVFQDNISE | ICISQKVGSTWHPGSTPKTKTETKSDSEF              | DNETN | -DRKL | 118 |
| ML01 ALPO                    | 121 | LEYFDP IPRRILATKGYDKCFEKGQVALVSAYGIHQLHIFIFVLAIFHILQCIITLTLGRIKMRKWKWEDETRTVEYQFYNDPERFRARDTTFGRRHLSMWTQSPILLWIVSFFRQFFG |                                               |                                            |       |       | 241 |
| ML01 LUPA                    | 121 | LEYFDP IPRRILATKGYDKCFEKGQVALVSAYGIHQLHIFIFVLAIFHILQCIITLTLGRIKMRKWKWEDETRTVEYQFYNDPERFRARDTTFGRRHLSMWTQSPILLWIVSFFRQFFG |                                               |                                            |       |       | 241 |
| ML01 <i>orientalis</i>       | 121 | LEYFDP IPRRILATKGYDKCFEKGQVALVSAYGIHQLHIFIFVLAIFHILQCIITLTLGRIKMRKWKWEDETRTVEYQFYNDPERFRARDTTFGRRHLSMWTQSPILLWIVSFFRQFFG |                                               |                                            |       |       | 241 |
| ML01 REDBERRY                | 121 | LEYFDP IPRRILATKGYDKCFEKGQVALVSAYGIHQLHIFIFVLAIFHILQCIITLTLGRIKMRKWKWEDETRTVEYQFYNDPERFRARDTTFGRRHLSMWTQSPILLWIVSFFRQFFG |                                               |                                            |       |       | 241 |
| ML01 <i>tomentosus</i>       | 121 | LEYFDP IPRRILATKGYDKCFEKGQVALVSAYGIHQLHIFIFVLAIFHILQCIITLTLGRIKMRKWKWEDETRTVEYQFYNDPERFRARDTTFGRRHLSMWTQSPILLWIVSFFRQFFG |                                               |                                            |       |       | 241 |
| ML01 <i>odemensis</i> ILL235 | 121 | LEYFDP IPRRILATKGYDKCFEKGQVALVSAYGIHQLHIFIFVLAIFHILQCIITLTLGRIKMRKWKWEDETRTVEYQFYNDPERFRARDTTFGRRHLSMWTQSPILLWIVSFFRQFFG |                                               |                                            |       |       | 241 |
| ML01 <i>odemensis</i> ILL39  | 121 | LEYFDP IPRRILATKGYDKCFEKGQVALVSAYGIHQLHIFIFVLAIFHILQCIITLTLGRIKMRKWKWEDETRTVEYQFYNDPERFRARDTTFGRRHLSMWTQSPILLWIVSFFRQFFG |                                               |                                            |       |       | 241 |
| ML01 <i>lamotei</i>          | 121 | LEYFDP IPRRILATKGYDKCFEKGQVALVSAYGIHQLHIFIFVLAIFHILQCIITLTLGRIKMRKWKWEDETRTVEYQFYNDPERFRARDTTFGRRHLSMWTQSPILLWIVSFFRQFFG |                                               |                                            |       |       | 241 |
| ML01 <i>ervoides</i>         | 121 | LEYFDP IPRRILATKGYDKCFEKGQVALVSAYGIHQLHIFIFVLAIFHILQCIITLTLGRIKMRKWKWEDETRTVEYQFYNDPERFRARDTTFGRRHLSMWTQSPILLWIVSFFRQFFG |                                               |                                            |       |       | 241 |
| ML01 <i>nigricans</i>        | 121 | LEYFDP IPRRILATKGYDKCFEKGQVALVSAYGIHQLHIFIFVLAIFHILQCIITLTLGRIKMRKWKWEDETRTVEYQFYNDPERFRARDTTFGRRHLSMWTQSPILLWIVSFFRQFFG |                                               |                                            |       |       | 241 |
| PsML01 ACO07297.1            | 122 | LEYFDP IPRRILATKGYDKCFEKGQVALVSAYGIHQLHIFIFVLAIFHILQCIITLTLGRIKMRKWKWEDETRTVEYQFYNDPERFRARDTTFGRRHLSMWTQSPILLWIVSFFRQFFG |                                               |                                            |       |       | 241 |
| MtML01 Medtr6g033330.1       | 120 | LEYFDP IPRRILATKGYDKCFEKGQVALVSAYGIHQLHIFIFVLAIFHILQCIITLTLGRIKMRKWKWEDETRTVEYQFYNDPERFRARDTTFGRRHLSMWTQSPILLWIVSFFRQFFG |                                               |                                            |       |       | 240 |
| CaML02 XP_004515994.1        | 119 | LEYFDP IPRRILATKGYDKCFEKGQVALVSAYGIHQLHIFIFVLAIFHILQCIITLTLGRIKMRKWKWEDETRTVEYQFYNDPERFRARDTTFGRRHLSMWTQSPILLWIVSFFRQFFG |                                               |                                            |       |       | 239 |
| ML01 ALPO                    | 242 | SINRVDYMALRHGFI MAHLAPGNDQAQDFDQKYISRSIEEDFKVVVGISPTIWLFTVLFLTNTHGWSSYYWLPFLPLIL                                         | ILLVGAKLQMIITKMGLRIQDRGEV                     | IKGAPLVEPGDHLFWFN                          |       |       | 362 |
| ML01 LUPA                    | 242 | SINRVDYMALRHGFI MAHLAPGNDQAQDFDQKYISRSIEEDFKVVVGISPTIWLFTVLFLTNTHGWSSYYWLPFLPLIL                                         | ILLVGAKLQMIITKMGLRIQDRGEV                     | IKGAPLVEPGDHLFWFN                          |       |       | 362 |
| ML01 <i>orientalis</i>       | 242 | SINRVDYMALRHGFI MAHLAPGNDQAQDFDQKYISRSIEEDFKVVVGISPTIWLFTVLFLTNTHGWSSYYWLPFLPLIL                                         | ILLVGAKLQMIITKMGLRIQDRGEV                     | IKGAPLVEPGDHLFWFN                          |       |       | 362 |
| ML01 REDBERRY                | 242 | SINRVDYMALRHGFI MAHLAPGNDQAQDFDQKYISRSIEEDFKVVVGISPTIWLFTVLFLTNTHGWSSYYWLPFLPLIL                                         | ILLVGAKLQMIITKMGLRIQDRGEV                     | IKGAPLVEPGDHLFWFN                          |       |       | 362 |
| ML01 <i>tomentosus</i>       | 242 | SINRVDYMALRHGFI MAHLAPGNDQAQDFDQKYISRSIEEDFKVVVGISPTIWLFTVLFLTNTHGWSSYYWLPFLPLIL                                         | ILLVGAKLQMIITKMGLRIQDRGEV                     | IKGAPLVEPGDHLFWFN                          |       |       | 362 |
| ML01 <i>odemensis</i> ILL235 | 242 | SINRVDYMALRHGFI MAHLAPGNDQAQDFDQKYISRSIEEDFKVVVGISPTIWLFTVLFLTNTHGWSSYYWLPFLPLIL                                         | ILLVGAKLQMIITKMGLRIQDRGEV                     | IKGAPLVEPGDHLFWFN                          |       |       | 362 |
| ML01 <i>odemensis</i> ILL39  | 242 | SINRVDYMALRHGFI MAHLAPGNDQAQDFDQKYISRSIEEDFKVVVGISPTIWLFTVLFLTNTHGWSSYYWLPFLPLIL                                         | ILLVGAKLQMIITKMGLRIQDRGEV                     | IKGAPLVEPGDHLFWFN                          |       |       | 362 |
| ML01 <i>lamotei</i>          | 242 | SINRVDYMALRHGFI MAHLAPGNDQAQDFDQKYISRSIEEDFKVVVGISPTIWLFTVLFLTNTHGWSSYYWLPFLPLIL                                         | ILLVGAKLQMIITKMGLRIQDRGEV                     | IKGAPLVEPGDHLFWFN                          |       |       | 362 |
| ML01 <i>ervoides</i>         | 242 | SINRVDYMALRHGFI MAHLAPGNDQAQDFDQKYISRSIEEDFKVVVGISPTIWLFTVLFLTNTHGWSSYYWLPFLPLIL                                         | ILLVGAKLQMIITKMGLRIQDRGEV                     | IKGAPLVEPGDHLFWFN                          |       |       | 362 |
| ML01 <i>nigricans</i>        | 242 | SINRVDYMALRHGFI MAHLAPGNDQAQDFDQKYISRSIEEDFKVVVGISPTIWLFTVLFLTNTHGWSSYYWLPFLPLIL                                         | ILLVGAKLQMIITKMGLRIQDRGEV                     | IKGAPLVEPGDHLFWFN                          |       |       | 362 |
| PsML01 ACO07297.1            | 243 | SINRVDYMALRHGFI MAHLAPGNDQAQDFDQKYISRSIEEDFKVVVGISPTIWLFTVLFLTNTHGWSSYYWLPFLPLIL                                         | ILLVGAKLQMIITKMGLRIQDRGEV                     | IKGAPLVEPGDHLFWFN                          |       |       | 363 |
| MtML01 Medtr6g033330.1       | 241 | SINRVDYMALRHGFI MAHLAPGNDQAQDFDQKYISRSIEEDFKVVVGISPTIWLFTVLFLTNTHGWSSYYWLPFLPLIL                                         | ILLVGAKLQMIITKMGLRIQDRGEV                     | IKGAPLVEPGDHLFWFN                          |       |       | 361 |
| CaML02 XP_004515994.1        | 240 | SINRVDYMALRHGFI MAHLAPGNDQAQDFDQKYISRSIEEDFKVVVGISPTIWLFTVLFLTNTHGWSSYYWLPFLPLIL                                         | ILLVGAKLQMIITKMGLRIQDRGEV                     | IKGAPLVEPGDHLFWFN                          |       |       | 360 |
| ML01 ALPO                    | 363 | RPRLLLFTHLVL FQNAFQLAFFVWSTYEFSITSCFHKTADTVIRITVGVL                                                                      | IQILCSYVTLPLIALVTQMGMSTMKPT                   | IFNGRVATALKNWHHTAKKQVKQSKHSNNTTPNSSQPSTPTH |       |       | 483 |
| ML01 LUPA                    | 363 | RPRLLLFTHLVL FQNAFQLAFFVWSTYEFSITSCFHKTADTVIRITVGVL                                                                      | IQILCSYVTLPLIALVTQMGMSTMKPT                   | IFNGRVATALKNWHHTAKKQVKQSKHSNNTTPNSSQPSTPTH |       |       | 483 |
| ML01 <i>orientalis</i>       | 363 | RPRLLLFTHLVL FQNAFQLAFFVWSTYEFSITSCFHKTADTVIRITVGVL                                                                      | IQILCSYVTLPLIALVTQMGMSTMKPT                   | IFNGRVATALKNWHHTAKKQVKQSKHSNNTTPNSSQPSTPTH |       |       | 483 |
| ML01 REDBERRY                | 363 | RPRLLLFTHLVL FQNAFQLAFFVWSTYEFSITSCFHKTADTVIRITVGVL                                                                      | IQILCSYVTLPLIALVTQMGMSTMKPT                   | IFNGRVATALKNWHHTAKKQVKQSKHSNNTTPNSSQPSTPTH |       |       | 483 |
| ML01 <i>tomentosus</i>       | 363 | RPRLLLFTHLVL FQNAFQLAFFVWSTYEFSITSCFHKTADTVIRITVGVL                                                                      | IQILCSYVTLPLIALVTQMGMSTMKPT                   | IFNGRVATALKNWHHTAKKQVKQSKHSNNTTPNSSQPSTPTH |       |       | 483 |
| ML01 <i>odemensis</i> ILL235 | 363 | RPRLLLFTHLVL FQNAFQLAFFVWSTYEFSITSCFHKTADTVIRITVGVL                                                                      | IQILCSYVTLPLIALVTQMGMSTMKPT                   | IFNGRVATALKNWHHTAKKQVKQSKHSNNTTPNSSQPSTPTH |       |       | 483 |
| ML01 <i>odemensis</i> ILL39  | 363 | RPRLLLFTHLVL FQNAFQLAFFVWSTYEFSITSCFHKTADTVIRITVGVL                                                                      | IQILCSYVTLPLIALVTQMGMSTMKPT                   | IFNGRVATALKNWHHTAKKQVKQSKHSNNTTPNSSQPSTPTH |       |       | 483 |
| ML01 <i>lamotei</i>          | 363 | RPRLLLFTHLVL FQNAFQLAFFVWSTYEFSITSCFHKTADTVIRITVGVL                                                                      | IQILCSYVTLPLIALVTQMGMSTMKPT                   | IFNGRVATALKNWHHTAKKQVKQSKHSNNTTPNSSQPSTPTH |       |       | 483 |
| ML01 <i>ervoides</i>         | 363 | RPRLLLFTHLVL FQNAFQLAFFVWSTYEFSITSCFHKTADTVIRITVGVL                                                                      | IQILCSYVTLPLIALVTQMGMSTMKPT                   | IFNGRVATALKNWHHTAKKQVKQSKHSNNTTPNSSQPSTPTH |       |       | 483 |
| ML01 <i>nigricans</i>        | 363 | RPRLLLFTHLVL FQNAFQLAFFVWSTYEFSITSCFHKTADTVIRITVGVL                                                                      | IQILCSYVTLPLIALVTQMGMSTMKPT                   | IFNGRVATALKNWHHTAKKQVKQSKHSNNTTPNSSQPSTPTH |       |       | 483 |
| PsML01 ACO07297.1            | 364 | RPRLLLFTHLVL FQNAFQLAFFVWSTYEFSITSCFHKTADTVIRITVGVL                                                                      | IQILCSYVTLPLIALVTQMGMSTMKPT                   | IFNGRVATALKNWHHTAKKQVKQSKHSNNTTPNSSQPSTPTH |       |       | 484 |
| MtML01 Medtr6g033330.1       | 362 | RPRLLLFTHLVL FQNAFQLAFFVWSTYEFSITSCFHKTADTVIRITVGVL                                                                      | IQILCSYVTLPLIALVTQMGMSTMKPT                   | IFNGRVATALKNWHHTAKKQVKQSKHSNNTTPNSSQPSTPTH |       |       | 482 |
| CaML02 XP_004515994.1        | 361 | RPRLLLFTHLVL FQNAFQLAFFVWSTYEFSITSCFHKTADTVIRITVGVL                                                                      | IQILCSYVTLPLIALVTQMGMSTMKPT                   | IFNGRVATALKNWHHTAKKQVKQSKHSNNTTPNSSQPSTPTH |       |       | 481 |
| ML01 ALPO                    | 484 | MSPVHLLHRHTAGNSDSPQTSPPKSNYKNEQWDIEGSGSTSPRNNQTGQNEIQIAGVESFSLAELPVRIRHEI                                                | --SSGSKDFSFEKRHIGRERLEL                       |                                            |       |       | 578 |
| ML01 LUPA                    | 484 | MSPVHLLHRHTAGNSDSPQTSPPKSNYKNEQWDIEGSGSTSPRNNQTGQNEIQIAGVESFSLAELPVRIRHEI                                                | --SSGSKDFSFEKRHIGRERLEL                       |                                            |       |       | 578 |
| ML01 <i>orientalis</i>       | 484 | MSPVHLLHRHTAGNSDSPQTSPPKSNYKNEQWDIEGSGSTSPRNNQTGQNEIQIAGVESFSLAELPVRIRHEI                                                | --SSGSKDFSFEKRHIGRERLEL                       |                                            |       |       | 578 |
| ML01 REDBERRY                | 484 | MSPVHLLHRHTAGNSDSPQTSPPKSNYKNEQWDIEGSGSTSPRNNQTGQNEIQIAGVESFSLAELPVRIRHEI                                                | --SSGSKDFSFEKRHIGRERLEL                       |                                            |       |       | 578 |
| ML01 <i>tomentosus</i>       | 484 | MSPVHLLHRHTAGNSDSPQTSPPKSNYKNEQWDIEGSGSTSPRNNQTGQNEIQIAGVESFSLAELPVRIRHEI                                                | --SSGSKDFSFEKRHIGRERLEL                       |                                            |       |       | 578 |
| ML01 <i>odemensis</i> ILL235 | 484 | MSPVHLLHRHTAGNSDSPQTSPPKSNYKNEQWDIEGSGSTSPRNNQTGQNEIQIAGVESFSLAELPVRIRHEI                                                | --SSGSKDFSFEKRHIGRERLEL                       |                                            |       |       | 578 |
| ML01 <i>odemensis</i> ILL39  | 484 | MSPVHLLHRHTAGNSDSPQTSPPKSNYKNEQWDIEGSGSTSPRNNQTGQNEIQIAGVESFSLAELPVRIRHEI                                                | --SSGSKDFSFEKRHIGRERLEL                       |                                            |       |       | 578 |
| ML01 <i>lamotei</i>          | 484 | MSPVHLLHRHTAGNSDSPQTSPPKSNYKNEQWDIEGSGSTSPRNNQTGQNEIQIAGVESFSLAELPVRIRHEI                                                | --SSGSKDFSFEKRHIGRERLEL                       |                                            |       |       | 578 |
| ML01 <i>ervoides</i>         | 484 | MSPVHLLHRHTAGNSDSPQTSPPKSNYKNEQWDIEGSGSTSPRNNQTGQNEIQIAGVESFSLAELPVRIRHEI                                                | --SSGSKDFSFEKRHIGRERLEL                       |                                            |       |       | 578 |
| ML01 <i>nigricans</i>        | 484 | MSPVHLLHRHTAGNSDSPQTSPPKSNYKNEQWDIEGSGSTSPRNNQTGQNEIQIAGVESFSLAELPVRIRHEI                                                | --SSGSKDFSFEKRHIGRERLEL                       |                                            |       |       | 578 |
| PsML01 ACO07297.1            | 485 | MSPVHLLHRHTAGNSDSPQTSPPKSNYKNEQWDIEGSGSTSPRNNQTGQNEIQIAGVESFSLAELPVRIRHEI                                                | --SSGSKDFSFEKRHIGRERLEL                       |                                            |       |       | 574 |
| MtML01 Medtr6g033330.1       | 483 | MSPVHLLHRHTAGNSDSPQTSPPKSNYKNEQWDIEGSGSTSPRNNQTGQNEIQIAGVESFSLAELPVRIRHEI                                                | --SSGSKDFSFEKRHIGRERLEL                       |                                            |       |       | 575 |
| CaML02 XP_004515994.1        | 482 | MSPVHLLHRHTAGNSDSPQTSPPKSNYKNEQWDIEGSGSTSPRNNQTGQNEIQIAGVESFSLAELPVRIRHEI                                                | --SSGSKDFSFEKRHIGRERLEL                       |                                            |       |       | 559 |
