# Supplementary material for: A genome-wide identification and comparative analysis of the lentil MLO genes
Source: PLoS One. 2018 Mar 23;13(3):e0194945. doi: 10.1371/journal.pone.0194945 (PMC5865747; doi:10.1371/journal.pone.0194945)
Supplement: S2 Fig — Alpo, Lupa and Redberry are cultivars of L. culinaris subsp. culinaris; Mt, Medicago truncatula; Ca, Cicer arietinum; the remaining names indicate the Lens species, or the subspecies orientalis of L. culinaris. Black, red and green lines indicate the same domains and motifs as in the S1 Fig. (PDF) [file pone.0194945.s002.pdf]

# S2 Fig

|                              |     |                                                                                                                                    |                                                                                                                          |      |      |          |          |       |    |     |
|------------------------------|-----|------------------------------------------------------------------------------------------------------------------------------------|--------------------------------------------------------------------------------------------------------------------------|------|------|----------|----------|-------|----|-----|
| MLO3 ALPO                    | 1   | MAGEGGGRSLTETPTWAVAVVCFVLLFISIIIEHIFHFIGNWLKKRHKSALYESLEKIKSELMLLGFISLLLVGQGLISKICISEKVAATWHPCSNNAAKGEDS                           | ----                                                                                                                     | EDES | GGGR | -RRL     | LAD      | ----- | PR | 120 |
| MLO3 LUPA                    | 1   | MAGEGGGRSLTETPTWAVAVVCFVLLFISIIIEHIFHFIGNWLKKRHKSALYESLEKIKSELMLLGFISLLLVGQGLISKICISEKVAATWHPCSNNAAKGEDS                           | ----                                                                                                                     | EDES | GGGR | -RRL     | LAD      | ----- | PR | 120 |
| MLO3 REDBERRY                | 1   | MAGEGGGRSLTETPTWAVAVVCFVLLFISIIIEHIFHFIGNWLKKRHKSALYESLEKIKSELMLLGFISLLLVGQGLISKICISEKVAATWHPCSNNAAKGEDS                           | ----                                                                                                                     | EDES | GGGR | -RRL     | LAD      | ----- | PR | 120 |
| MLO3 <i>orientalis</i>       | 1   | MAGEGGGRSLTETPTWAVAVVCFVLLFISIIIEHIFHFIGNWLKKRHKSALYESLEKIKSELMLLGFISLLLVGQGLISKICISEKVAATWHPCSNNAAKGEDS                           | ----                                                                                                                     | EDES | GGGR | -RRL     | LAD      | ----- | PR | 120 |
| MLO3 <i>lamotei</i>          | 1   | MAGEGGGRSLTETPTWAVAVVCFVLLFISIIIEHIFHFIGNWLKKRHKSALYESLEKIKSELMLLGFISLLLVGQGLISKICISEKVAATWHPCSNNAAKGEDS                           | ----                                                                                                                     | EDES | GGGR | -RRL     | LAD      | ----- | PR | 120 |
| MLO3 <i>odemensis</i> ILL235 | 1   | MAGEGGGRSLTETPTWAVAVVCFVLLFISIIIEHIFHFIGNWLKKRHKSALYESLEKIKSELMLLGFISLLLVGQGLISKICISEKVAATWHPCSNNAAKGEDS                           | ----                                                                                                                     | EDES | GGGR | -RRL     | LAD      | ----- | SR | 120 |
| MLO3 <i>odemensis</i> ILL39  | 1   | MAGEGGGRSLTETPTWAVAVVCFVLLFISIIIEHIFHFIGNWLKKRHKSALYESLEKIKSELMLLGFISLLLVGQGLISKICISEKVAATWHPCSNNAAKGEDS                           | ----                                                                                                                     | EDES | GGGR | -RRL     | LAD      | ----- | PR | 120 |
| MLO3 <i>tomentosus</i>       | 1   | MAGEGGGRSLTETPTWAVAVVCFVLLFISIIIEHIFHFIGNWLKKRHKSALYESLEKIKSELMLLGFISLLLVGQGLISKICISEKVAATWHPCSNNAAKGEDS                           | ----                                                                                                                     | EDES | GGGR | -RRL     | LAD      | ----- | PR | 120 |
| MLO3 <i>eroides</i>          | 1   | MAGEGGGRSLTETPTWAVAVVCFVLLFISIIIEHIFHFIGNWLKKRHKSALYESLEKIKSELMLLGFISLLLVGQGLISKICISEKVAATWHPCSNNAAKGEDS                           | ----                                                                                                                     | EDES | GGGR | -RRL     | LAD      | ----- | PR | 120 |
| MLO3 <i>nigricans</i>        | 1   | MAGEGGGRSLTETPTWAVAVVCFVLLFISIIIEHIFHFIGNWLKKRHKSALYESLEKIKSELMLLGFISLLLVGQGLISKICISEKVAATWHPCSNNAAKGEDS                           | ----                                                                                                                     | EDES | GGGR | -RRL     | LAD      | ----- | PR | 121 |
| CaMLO6 XP_004487134.1        | 1   | MAG--GGRSLTETPTWAVAVVCFVLLSISIIIEHIFHIGKWLKHKHSALYESLEKIKSELMLLGFISLLLVGGLISGGLISKICISEKVAATWHPCTNNAERNSDHQP                       | IEHETGG--                                                                                                                | RRL  | LA   | ALL      | ASQNKNSR |       |    | 128 |
| MtMLO3 Medtr2g093750.1       | 1   | MAGSGVGRSLTETPTWAVAVVCFVLLSISIFIEHIFHIEKWLKHKHSALYESLEKIKSELMLLGFISLLLVGGLISRICISEKVAATWHPCSNNANIESDDEELIDHETGGS                   | -RRL                                                                                                                     | LA   | ALL  | ASQGDNNH |          |       |    | 132 |
| MLO3 ALPO                    | 121 | RILAGGGFDKCAENGKVAFVSADGIHQHIFIFVLAVFHVLYCILTALGRAKMRWRKWEETKTLEYQFSHPDRFRFANETSFGRRHLSFWTKNPILIWIVCFFRQFVRSVPEVDYLTLRHGFMMAHLAP   |                                                                                                                          |      |      |          |          |       |    | 253 |
| MLO3 LUPA                    | 121 | RILAGGGFDKCAENGKVAFVSADGIHQHIFIFVLAVFHVLYCILTALGRAKMRWRKWEETKTLEYQFSHPDRFRFANETSFGRRHLSFWTKNPILIWIVCFFRQFVRSVPEVDYLTLRHGFMMAHLAP   |                                                                                                                          |      |      |          |          |       |    | 253 |
| MLO3 REDBERRY                | 121 | RILAGGGFDKCAENGKVAFVSADGIHQHIFIFVLAVFHVLYCILTALGRAKMRWRKWEETKTLEYQFSHPDRFRFANETSFGRRHLSFWTKNPILIWIVCFFRQFVRSVPEVDYLTLRHGFMMAHLAP   |                                                                                                                          |      |      |          |          |       |    | 253 |
| MLO3 <i>orientalis</i>       | 121 | RILAGGGFDKCAENGKVAFVSADGIHQHIFIFVLAVFHVLYCILTALGRAKMRWRKWEETKTLEYQFSHPDRFRFANETSFGRRHLSFWTKNPILIWIVCFFRQFVRSVPEVDYLTLRHGFMMAHLAP   |                                                                                                                          |      |      |          |          |       |    | 253 |
| MLO3 <i>lamotei</i>          | 121 | RILAGGGFDKCAENGKVAFVSADGIHQHIFIFVLAVFHVLYCILTALGRAKMRWRKWEETKTLEYQFSHPDRFRFANETSFGRRHLSFWTKNPILIWIVCFFRQFVRSVPEVDYLTLRHGFMMAHLAP   |                                                                                                                          |      |      |          |          |       |    | 253 |
| MLO3 <i>odemensis</i> ILL235 | 121 | RILAGGGFDKCAENGKVAFVSADGIHQHIFIFVLAVFHVLYCILTALGRAKMRWRKWEETKTLEYQFSHPDRFRFANETSFGRRHLSFWTKNPILIWIVCFFRQFVRSVPEVDYLTLRHGFMMAHLAP   |                                                                                                                          |      |      |          |          |       |    | 253 |
| MLO3 <i>odemensis</i> ILL39  | 121 | RILAGGGFDKCAENGKVAFVSADGIHQHIFIFVLAVFHVLYCILTALGRAKMRWRKWEETKTLEYQFSHPDRFRFANETSFGRRHLSFWTKNPILIWIVCFFRQFVRSVPEVDYLTLRHGFMMAHLAP   |                                                                                                                          |      |      |          |          |       |    | 253 |
| MLO3 <i>tomentosus</i>       | 121 | RILAGGGFDKCAENGKVAFVSADGIHQHIFIFVLAVFHVLYCILTALGRAKMRWRKWEETKTLEYQFSHPDRFRFANETSFGRRHLSFWTKNPILIWIVCFFRQFVRSVPEVDYLTLRHGFMMAHLAP   |                                                                                                                          |      |      |          |          |       |    | 253 |
| MLO3 <i>eroides</i>          | 121 | RILAGGGFDKCAENGKVAFVSADGIHQHIFIFVLAVFHVLYCILTALGRAKMRWRKWEETKTLEYQFSHPDRFRFANETSFGRRHLSFWTKNPILIWIVCFFRQFVRSVPEVDYLTLRHGFMMAHLAP   |                                                                                                                          |      |      |          |          |       |    | 253 |
| MLO3 <i>nigricans</i>        | 122 | RILAGGGFDKCAENGKVAFVSADGIHQHIFIFVLAVFHVLYCILTALGRAKMRWRKWEETKTLEYQFSHPDRFRFANETSFGRRHLSFWTKNPILIWIVCFFRQFVRSVPEVDYLTLRHGFMMAHLAP   |                                                                                                                          |      |      |          |          |       |    | 254 |
| CaMLO6 XP_004487134.1        | 129 | RILAGGIDKCAAGKVAFVSSEG                                                                                                             | IHQHIFIFVLAVFHVLYCILTALGRAKMRWRKWEETKTLEYQFSHPDRFRFANETSFGRRHLSFWTKNPILIWIVCFFRQFVRSVPEVDYLTLRHGFMMAHLAP                 |      |      |          |          |       |    | 261 |
| MtMLO3 Medtr2g093750.1       | 133 | RILAGGGDKCAEGKVAFVSAG                                                                                                              | IHQHIFIFVLAVFHILCYLTALGRAKMRWRKWEATKTPEYQFSHPDRFRFANETSFGRRHLSFWTKNPVLIWIVCFFRQFVRSVPEVDYLTLRHGFMMAHLAP                  |      |      |          |          |       |    | 265 |
| MLO3 ALPO                    | 254 | SSHQKFDFRQYIKRCLLEDFKVVVEISPLWFIAVFFLLFHTHGWYSYLWLPFVPLIIVLLVGTKLQVIITQMGRLIQQGMVVKGEVVQPGDDLFWFNKPRILYLINFVLFQNAFQLAFFSWTAFQFGLK  |                                                                                                                          |      |      |          |          |       |    | 386 |
| MLO3 LUPA                    | 254 | SSHQKFDFRQYIKRCLLEDFKVVVEISPLWFIAVFFLLFHTHGWYSYLWLPFVPLIIVLLVGTKLQVIITQMGRLIQQGMVVKGEVVQPGDDLFWFNKPRILYLINFVLFQNAFQLAFFSWTAFQFGLK  |                                                                                                                          |      |      |          |          |       |    | 386 |
| MLO3 REDBERRY                | 254 | SSHQKFDFRQYIKRCLLEDFKVVVEISPLWFIAVFFLLFHTHGWYSYLWLPFVPLIIVLLVGTKLQVIITQMGRLIQQGMVVKGEVVQPGDDLFWFNKPRILYLINFVLFQNAFQLAFFSWTAFQFGLK  |                                                                                                                          |      |      |          |          |       |    | 386 |
| MLO3 <i>orientalis</i>       | 254 | SSHQKFDFRQYIKRCLLEDFKVVVEISPLWFIAVFFLLFHTHGWYSYLWLPFVPLIIVLLVGTKLQVIITQMGRLIQQGMVVKGEVVQPGDDLFWFNKPRILYLINFVLFQNAFQLAFFSWTAFQFGLK  |                                                                                                                          |      |      |          |          |       |    | 386 |
| MLO3 <i>lamotei</i>          | 254 | SSHQKFDFRQYIKRCLLEDFKVVVEISPLWFIAVFFLLFHTHGWYSYLWLPFVPLIIVLLVGTKLQVIITQMGRLIQQGMVVKGEVVQPGDDLFWFNKPRILYLINFVLFQNAFQLAFFSWTAFQFGLK  |                                                                                                                          |      |      |          |          |       |    | 386 |
| MLO3 <i>odemensis</i> ILL235 | 254 | SSHQKFDFRQYIKRCLLEDFKVVVEISPLWFIAVFFLLFHTHGWYSYLWLPFVPLIIVLLVGTKLQVIITQMGRLIQQGMVVKGEVVQPGDDLFWFNKPRILYLINFVLFQNAFQLAFFSWTAFQFGLK  |                                                                                                                          |      |      |          |          |       |    | 386 |
| MLO3 <i>odemensis</i> ILL39  | 254 | LSSHQKFDFRQYIKRCLLEDFKVVVEISPLWFIAVFFLLFHTHGWYSYLWLPFVPLIIVLLVGTKLQVIITQMGRLIQQGMVVKGEVVQPGDDLFWFNKPRILYLINFVLFQNAFQLAFFSWTAFQFGLK |                                                                                                                          |      |      |          |          |       |    | 386 |
| MLO3 <i>tomentosus</i>       | 254 | LSSHQKFDFRQYIKRCLLEDFKVVVEISPLWFIAVFFLLFHTHGWYSYLWLPFVPLIIVLLVGTKLQVIITQMGRLIQQGMVVKGEVVQPGDDLFWFNKPRILYLINFVLFQNAFQLAFFSWTAFQFGLK |                                                                                                                          |      |      |          |          |       |    | 386 |
| MLO3 <i>eroides</i>          | 254 | SSHQKFDFRQYIKRCLLEDFKVVVEISPLWFIAVFFLLFHTHGWYSYLWLPFVPLIIVLLVGTKLQVIITQMGRLIQQGMVVKGEVVQPGDDLFWFNKPRILYLINFVLFQNAFQLAFFSWTAFQFGLK  |                                                                                                                          |      |      |          |          |       |    | 386 |
| MLO3 <i>nigricans</i>        | 255 | SSHQKFDFRQYIKRCLLEDFKVVVEISPLWFIAVFFLLFYTHGWYSYLWLPFVPLIIVLLVGTKLQVIITQMGRLIQQGMVVKGEVVQPGDDLFWFNKPRILYLINFVLFQNAFQLAFFSWTAFQFGLK  |                                                                                                                          |      |      |          |          |       |    | 387 |
| CaMLO6 XP_004487134.1        | 262 | QSHQKFDFRH                                                                                                                         | YIKRCLLEDFKVVVEISPLWFITVLLFLLFHTHGWHSYLWLPFVPLIIVLLVGTKLQVIITQMGRLIQQGMVVKGEVVQPGDDLFWFSKPRILHLINFVLFQNAFQLAFFSWTALQFGLT |      |      |          |          |       |    | 394 |
| MtMLO3 Medtr2g093750.1       | 266 | QSHLKFDFRQYIKRCLLEDFKVVVG                                                                                                          | ISPLWFITVFFLLFHTHGWHSYLWLPFLPLIIVLLVGTKLQVIITQMGRLIQQGMVVKGEVVQPRDDLFWFNKPRILFLINFVLFQNAFQLAFFSWTALQFGLT                 |      |      |          |          |       |    | 398 |
| MLO3 ALPO                    | 387 | SCYNSRSEDVIRISMGIIVQILCSYVTLPLYALVTQMGSTMKPTIFNERVATALKHWHHNAKHHIKQNRGPGFQSPMTRSITPARSMSPAHLPHCRSEIDLS                             | -----                                                                                                                    |      |      |          |          |       |    | 505 |
| MLO3 LUPA                    | 387 | SCYNSRSEDVIRISMGIIVQILCSYVTLPLYALVTQMGSTMKPTIFNERVATALKHWHHNAKHHIKQNRGPGFQSPMTRSITPARSMSPAHLPHCRSEIDLS                             | -----                                                                                                                    |      |      |          |          |       |    | 505 |
| MLO3 REDBERRY                | 387 | SCYNSRSEDVIRISMGIIVQILCSYVTLPLYALVTQMGSTMKPTIFNERVATALKHWHHNAKHHIKQNRGPGFQSPMTRSITPARSMSPAHLPHCRSEIDLS                             | -----                                                                                                                    |      |      |          |          |       |    | 505 |
| MLO3 <i>orientalis</i>       | 387 | SCYNSRSEDVIRISMGIIVQILCSYVTLPLYALVTQMGSTMKPTIFNERVATALKHWHHNAKHHIKQNRGPGFQSPMTRSITPARSMSPAHLPHCRSEIDLS                             | -----                                                                                                                    |      |      |          |          |       |    | 505 |
| MLO3 <i>lamotei</i>          | 387 | SCYNSRSEDVIRISMGIIVQILCSYVTLPLYALVTQMGSTMKPTIFNERVATALKHWHHNAKHHIKQNRGPGFQSPMTRSITPARSMSPAHLPHCRSEIDLS                             | -----                                                                                                                    |      |      |          |          |       |    | 505 |
| MLO3 <i>odemensis</i> ILL235 | 387 | SCYNSRSEDVIRISMGIIVQILCSYVTLPLYALVTQMGSTMKPTIFNERVATALKHWHHNAKHHIKQNRGPGFQSPMTRSITPARSMSPAHLPHCRSEIDLS                             | -----                                                                                                                    |      |      |          |          |       |    | 505 |
| MLO3 <i>odemensis</i> ILL39  | 387 | SCYNSRSEDVIRISMGIIVQILCSYVTLPLYALVTQMGSTMKPTIFNERVATALKHWHHNAKHHIKQNRGPGFQSPMTRSITPARSMSPAHLPHCRSEIDLS                             | -----                                                                                                                    |      |      |          |          |       |    | 505 |
| MLO3 <i>tomentosus</i>       | 387 | SCYNSRSEDVIRISMGIIVQILCSYVTLPLYALVTQMGSTMKPTIFNERVATALKHWHHNAKHHIKQNRGPGFQSPMTRSITPARSMSPAHLPHCRSEIDLS                             | -----                                                                                                                    |      |      |          |          |       |    | 505 |
| MLO3 <i>eroides</i>          | 387 | SCYNSRSEDVIRISMGIIVQILCSYVTLPLYALVTQMGSTMKPTIFNERVATALKHWHHNAKHHIKQNRGPGFQSPMTRSITPARSMSPAHLPHCRSEIDLS                             | -----                                                                                                                    |      |      |          |          |       |    | 505 |
| MLO3 <i>nigricans</i>        | 388 | SCYNSRSEDVIRISMGIIVQILCSYVTLPLYALVTQMGSTMKPTIFNERVATALKHWHHNAKHHIKQNRGPGFQSPMTRSITPARSMSPAHLPHCRSEIDLS                             | -----                                                                                                                    |      |      |          |          |       |    | 506 |
| CaMLO6 XP_004487134.1        | 395 | SCFNSRTEDVIRISMGIVVQILCSYVTLPLYALVTQMGSTMKPTIFNERVATLRNWHNTAKHHIKQNRSGFQSPMSTRSITPAHSMSPAHLRPHYSETDTHPTTSPTRLNFETYNPYEAYSPSPSN     | ---                                                                                                                      |      |      |          |          |       |    | 524 |
| MtMLO3 Medtr2g093750.1       | 399 | SCYNSRKDGVVIRICMGVFVQILCSYVTLPLYALVTQMGSTMKPTIFNERVATLRNWHNTAKHHIKQNRSGSQTPFSRSITPARSMSPAQLRHRYRNQMDT                              | -----                                                                                                                    |      |      |          |          |       |    | 526 |
| MLO3 ALPO                    | 506 | HKVET---SSGSIILHEMEMGHLARDKEQEVGPNCVSVGLGRPRFVVDVQHSDEFSSFSKMATNQLE*                                                               |                                                                                                                          |      |      |          |          |       |    | 570 |
| MLO3 LUPA                    | 506 | HKVET---SSGSIILHEMEMGHLARDKEQEVGPNCVSVGLGRPRFVVDVQHSDEFSSFSKMATNQLE*                                                               |                                                                                                                          |      |      |          |          |       |    | 570 |
| MLO3 REDBERRY                | 506 | HKVET---SSGSIILHEMEMGHLARDKEQEVGPNCVSVGLGRPRFVVDVQHSDEFSSFSKMATNQLE*                                                               |                                                                                                                          |      |      |          |          |       |    | 570 |
| MLO3 <i>orientalis</i>       | 506 | HKVET---SSGSIILHEMEMGHLARDKEQEVGPNCVSVGLGRPRFVVDVQHSDEFSSFSKMATNQLE*                                                               |                                                                                                                          |      |      |          |          |       |    | 570 |
| MLO3 <i>lamotei</i>          | 506 | HKVETGAASSGSIILHEMEMGHLARDKEQEVGPNCVSVGLGRPQFVVDVQHSDEFSSFSKMATNQLE*                                                               |                                                                                                                          |      |      |          |          |       |    | 573 |
| MLO3 <i>odemensis</i> ILL235 | 506 | HKVETGAASSGSIILHEMEMGHLARDKEQEVGPNCVSVGLGRPQFVVDVQHSDEFSSFSKMATNQLE*                                                               |                                                                                                                          |      |      |          |          |       |    | 573 |
| MLO3 <i>odemensis</i> ILL39  | 506 | HKVET---SSGLIILHEMEMGHLARDKEQEVGPNCVSVGLGRPQFVVDVQHSDEFSSFSKMATNQLE*                                                               |                                                                                                                          |      |      |          |          |       |    | 570 |
| MLO3 <i>tomentosus</i>       | 506 | HKVET---SSGSIILHEMEMGHLARDKEQEVGPNCVSVGLGRPRFVVDVQHSDEFSSFSKMATNQLE*                                                               |                                                                                                                          |      |      |          |          |       |    | 570 |
| MLO3 <i>eroides</i>          | 506 | HKVETGVA                                                                                                                           | SSGSIILHEMEMGHLARDKEQEVGPNCVSVGLGRPQFVVDVQHSDEFSSFSKMATNQLE*                                                             |      |      |          |          |       |    | 573 |
| MLO3 <i>nigricans</i>        | 507 | HKVET---SSGSIILHEMEMGHLARDKEQEVGPNCVSVGLGRPQFVVDVQHSDEFSSFSKMATNQLE*                                                               |                                                                                                                          |      |      |          |          |       |    | 571 |
| CaMLO6 XP_004487134.1        | 525 | -KVEARATSSSSIIYFHEMEMGHLAHDHEQETNKPNCVSVGSGLTQLEIDVQHSDEFSSFSKMATNNLK-                                                             |                                                                                                                          |      |      |          |          |       |    | 590 |
| MtMLO3 Medtr2g093750.1       | 527 | HKVEINVA                                                                                                                           | SSSSTHHEMEMGHLAHEVQEEVIKPNISIVSGSGRPQFEIDIQSDELFSFSTMPITNQLE*                                                            |      |      |          |          |       |    | 594 |
