# Supplementary material for: A genome-wide identification and comparative analysis of the lentil MLO genes
Source: PLoS One. 2018 Mar 23;13(3):e0194945. doi: 10.1371/journal.pone.0194945 (PMC5865747; doi:10.1371/journal.pone.0194945)
Supplement: S5 Fig — Sequences of legume species, including L. culinaris and L. odemensis, compared to A. thaliana and H. vulgare sequences. Bottom horizontal lines indicate the predicted positions within of the Lens sequences of the Syntaxin domain (black), SNARE domain (red), and transmembrane domain (green). Intensity of the background blue color denotes similarity. (PDF) [file pone.0194945.s005.pdf]

|                                                         |     |                                                                                                                                                                                                                                               |     |
|---------------------------------------------------------|-----|-----------------------------------------------------------------------------------------------------------------------------------------------------------------------------------------------------------------------------------------------|-----|
| <i>H. vulgare</i> Ror2 AY246907.1                       | 1   | MNNL FSSSWK RAGAGGDDGL ESGGGGV EMTAPP --- --GAAAGAS LDRFFEDVES I KDDL RELER IQRSL HDGNE SGSKL HDASAVRAL RSRMDADVAAL I K KAKVVKLR L ESLDRANAANRSVA                                                                                             | 120 |
| <i>A. thaliana</i> AEE75103.1 syntxin-121               | 1   | MNDL FSSSFRSFRSGE - P S P R R D L - - VAGGDGVGMANPAAGSTGGVNL DKDFEDVESVKEEL KDLRLNET LSSCHEQSKTL HNAKAVKDL RSRMDGVGVAL KKAKM I KVKLEALDRSNAANRSLP                                                                                             | 123 |
| <i>A. ipaensis</i> XP_019428840.1                       | 1   | MNDL FSGSFSRL RNER - TSPDRH - HVI EMSAVTP --- -DAAGSGGVHL DKFFDDVEGVKDEL REVERLL QSLQSSHEQSKTL HNAAVRDL RSRMDADVSAL K KAKV I KLRLEALDRSNAANRNL P                                                                                              | 121 |
| <i>C. cajan</i> XP_020240337.1                          | 1   | MNDL FSGSFS - - R NTEQASPD - GHV I EMASP - - - - - PSSGGVNL EKFFEEVESVKEEL KELER L HESLRSSHEQSKTL HSAKAVKDL RSRMDADVAL AKRAK I VKIRLEALDRSNEASRSL P                                                                                           | 116 |
| <i>C. cajan</i> XP_020220797.1                          | 1   | MNDL I SGFSFRFRGGE - ASPEHHQHV VEMSG IGR --- - RGG --- - EVNLDKFFEDVEGVKDEL KELEELARSL KSGHEQSKTL HNAKAVKDL RSRMDADVAL AKKAK I I K L KLEALDRSNAANRNL P                                                                                        | 119 |
| <i>P. vulgaris</i> XP_007145783.                        | 1   | MNDL I SGFSFRSFRSE - ASPDRH - HVI EMTGVGG --- - DGAGGVKVNLDKFFEDVESVKEEL KELEGLAQSLRRSHEQSKTL HNAKAVKDL RSRMDGVGVSAL K KAK I I K L KLEALDRSNAANRNL P                                                                                          | 121 |
| <i>G. max</i> XP_003519112.1                            | 1   | MNDL FSGSFSFRSFRSDQ - SSPDRH - HDI EMGATAS --- - SGGRGGEVNLDKFFEDVEGVKDEL KELEGLAQSLRRSHEQSKTL HNAKAVRDL RARMDDGVGVSAL K KAK I I K L KLEALERSNAANRNP                                                                                          | 121 |
| <i>L. angustifolius</i> XP_019428840.1                  | 1   | MNDL FS - - - - RLHSDR - ASPDRH - HVI EMSTAA T - DAAAPSGGGVNL DKFFDDVEGVKDEL KELDQ I AKSLQNSNEQSKTL HDAKSVKDL RSRMDDDVSL AKKAKVVK I RLEALERSNAANRSL P                                                                                         | 119 |
| <i>C. arrietinum</i> XP_004497646.1                     | 1   | MNNL FSGSFRSFRSE - TSPDRH - HVI EMSDTG --- - ANSTGGRVNL DKFFDDVEGVKDDL KELEG I SNRLKSHESKST I HDAKSVKDL RSRMDDDVSL K KAKMVKL KLEALERSNAANRNL P                                                                                                | 120 |
| <i>M. truncatula</i> XP_003590328.1                     | 1   | MNDL FSGSFRSFRSNDQVSPDNHHV I EMSSPN --- - TAQTGVLHDKFFEEVEGVKDEL KDLRLYESLRVSHERSKTL HSAKAVKDL RSRMDADVAL AKKAK I K L KLEALDRSNEASRSL P                                                                                                       | 120 |
| <i>M. truncatula</i> XP_003590329.1 syntxin 122 protein | 1   | MNNL FTGFSFRSFRSEE - VSPDRH - HVI EMTDGA GTRTGAGAGGR I NL DKFFDDVEGVKDDL KELES I HQRLSKTNEQTKTV HDAKGVKEL RSRMD E E V S A L K K A K M V K L K L E K L R S N A A N R N L E                                                                     | 124 |
| <i>L. culinaris</i> cv. Alpo 1                          | 1   | MNNL FTNSFSFRFHSEE - PTPDRH - HVI EMTDAG --- - SPGTGARVNL DKFFDDVEGVKDDL KELEA I SQKLNKSNEQSKT I HDAKGVKEL RSRMDDDVSL K KAKMVKL KLEALERSNAANRNL P                                                                                             | 120 |
| <i>L. culinaris</i> cv. Alpo 2                          | 1   | MNNL FTNSFSFRFHSEE - PTPDRH - HVI EMTDAG --- - SPGTGARVNL DKFFDDVEGVKDDL KELEA I SQKLNKSNEQSKT I HDAKGVKEL RSRMDDDVSL K KAKMVKL KLEALERSNAANRNL P                                                                                             | 120 |
| <i>L. culinaris</i> GFBR01017428.1                      | 1   | MNNL FTNSFSFRFHSEE - PTPDRH - HVI EMTDAG --- - SPGTGARVNL DKFFDDVEGVKDDL KELEA I SQKLNKSNEQSKT I HDAKGVKEL RSRMDDDVSL K KAKMVKL KLEALERSNAANRNL P                                                                                             | 120 |
| <i>L. odemensis</i>                                     | 1   | MNNL FTNSFSFRFHSEE - PTPDRH - HVI EMTDAG --- - SPGTGARVNL DKFFDDVEGVKDDL KELEA I SQKLNKSNEQSKT I HDAKGVKEL RSRMDDDVSL K KAKMVKL KLEALERSNAANRNL P                                                                                             | 120 |
| <hr/>                                                   |     |                                                                                                                                                                                                                                               |     |
| <i>H. vulgare</i> Ror2 AY246907.1                       | 121 | CGCGPGSSDTRT R TSVVGLK KKL K D M E S F S S L R S R I T S E Y R E T V A R R Y F T V T G N P D E A T L D T I A E T G E G E R L Q R A I A E Q G R G E V L G V V A E I Q E R H G A V A D L E R S L L E L Q O V F N D M A V L V A A Q              | 246 |
| <i>A. thaliana</i> AEE75103.1 syntxin-121               | 124 | CGCGPGSSDTRT R TSVL NGLR K K L M D S M D S F N R L R E L I S S E Y R E T V Q R R Y F T V T G E N P D E R T L D R L I S T G E S E R F L Q K A I Q E Q - G R G R V L D T I N E I Q E R H D A V K D I E K N L R E L H Q V F L D M A V L V E H Q  | 248 |
| <i>A. ipaensis</i> XP_019428840.1                       | 122 | CGCGPGSSDTRT R TSVVGLK KKL K D M S M F N L R Q Q I S A E Y R E T V Q R R Y F T V T G E N P D E K T L D L I S T G E S E T F L Q K A I Q E Q - G R G R I L D T I N E I Q E R H D A V K E I E K N L K E L H Q V F L D M A V L V Q T Q            | 246 |
| <i>C. cajan</i> XP_020240337.1                          | 117 | GSFGPGSSDTRT R TSVGLR K K L K D S M D S F N N L R Q Q I S S E Y R E T V Q R R Y F T V T G E N P D K T I D L L I S T G E S E T F L Q K A I Q E Q - G R A S V M E T I Q E I Q E R H D T V K E I E R N L K E L H Q V F M D M A V L V Q S Q       | 241 |
| <i>C. cajan</i> XP_020220797.1                          | 120 | CGCGPGSSDTRT R TSVVGLK KKL K D S M S F N E I R H L V S S E Y R E T V Q R R Y F T V T G E N P D N T L D R L I S T G E S E T F L Q K A I Q E Q - G R G R I L D T I N E I Q E R H D A V K D L E K S L K E L H Q V F L D M T V L V Q H Q          | 244 |
| <i>P. vulgaris</i> XP_007145783.                        | 122 | CGCGPGSSDTRT R TSVV NGL K K L K D S M S F N E I R Q L V S S E Y R E T V Q R R Y F T V T G E N P D D T L D L I S T G E S E T F L Q K A I Q E Q - G R G R I L D T I N E I Q E R H D A V K E L K S L K E L H Q V F L D M T V L V Q H Q           | 246 |
| <i>G. max</i> XP_003519112.1                            | 122 | CGCGPGSSDTRT R TSVV NGL K K L K D M E S F N E I R Q L V S S E Y R E T V Q R R Y F T V T G E N P D K T L D L I S T G E S E T F L Q K A I Q E Q - G R G R I L D T I N E I Q E R H D A V K E I E K N L K E L H Q V F L D M T V L V Q H Q         | 246 |
| <i>L. angustifolius</i> XP_019428840.1                  | 120 | CGCGPGSSDTRT R TSVV I G L K K L K D S M S F N E V R Q L I S S E Y R D T V Q R R Y F N T V T G E N P D E K T L D R L I S T G E S E T F L Q K A I Q E Q - G R G R I L D T I N E I Q E R H D A V K D L E K S L L E L H Q V F L D M A V L V E S Q | 244 |
| <i>C. arrietinum</i> XP_004497646.1                     | 121 | CGCGPGSSDTRT R S V V G L R K K L K D S M D T F N R L R E L I S S E Y R E T V Q R R Y F T V T G E N P D K T L D L I S T G E S E T F L Q K A I Q E Q - G R G R I L D T I N E I Q E R H D A V K D L E K S L L E L H Q V F L D M T V M V Q F Q    | 245 |
| <i>M. truncatula</i> XP_003590328.1                     | 121 | GAGPGSSDTRT R TSVVGLR K K L K D S M D S F N N L R Q Q I S S E Y R E T V Q R R Y F T V T G E N P D K T V D L L I S T G E S E T F L Q K A I Q Q Q - G R A N I M D T I Q E I Q E R H D T V K E I E R N L M E L H Q V F M D M S V L V Q S Q       | 245 |
| <i>M. truncatula</i> XP_003590329.1 syntxin 122 protein | 125 | CGCGPGSSDTRT R TSVV NGL K K L K D S M S F N L R E V I T T E Y R E T V Q R R Y F T V T G E N P D K T L D L I S T G E S E T F L Q K A I Q E Q - G R G R I L D T I N E I Q E R H D A V K D L E K S L L A L H Q V F L D M T V L V Q F Q           | 249 |
| <i>L. culinaris</i> cv. Alpo 1                          | 121 | CGCGPGSSDTRT R S V V N G L K K L K D S M E T F N R L R E V I S S E Y R E T V Q R R Y F T V T G E N P D K T L D L I S S G E S E T F L Q K A I Q E Q - G R G R I L D T I N E I Q E R H D A V K E L E K N L L A L H Q V F L D M T V L V Q F Q    | 245 |
| <i>L. culinaris</i> cv. Alpo 2                          | 121 | CGCGPGSSDTRT R S V V N G L K K L K D S M E T F N R L R E V I S S E Y R E T V Q R R Y F T V T G E N P D K T L D L I S S G E S E T F L Q K A I Q E Q                                                                                            |     |
